# Supplementary figures and images for: Transposition-mediated DNA re-replication in maize
Source: eLife journal article supplement (doi:10.7554/elife.03724), 2014-11-18

Fig. 1 - Figure supplement 1

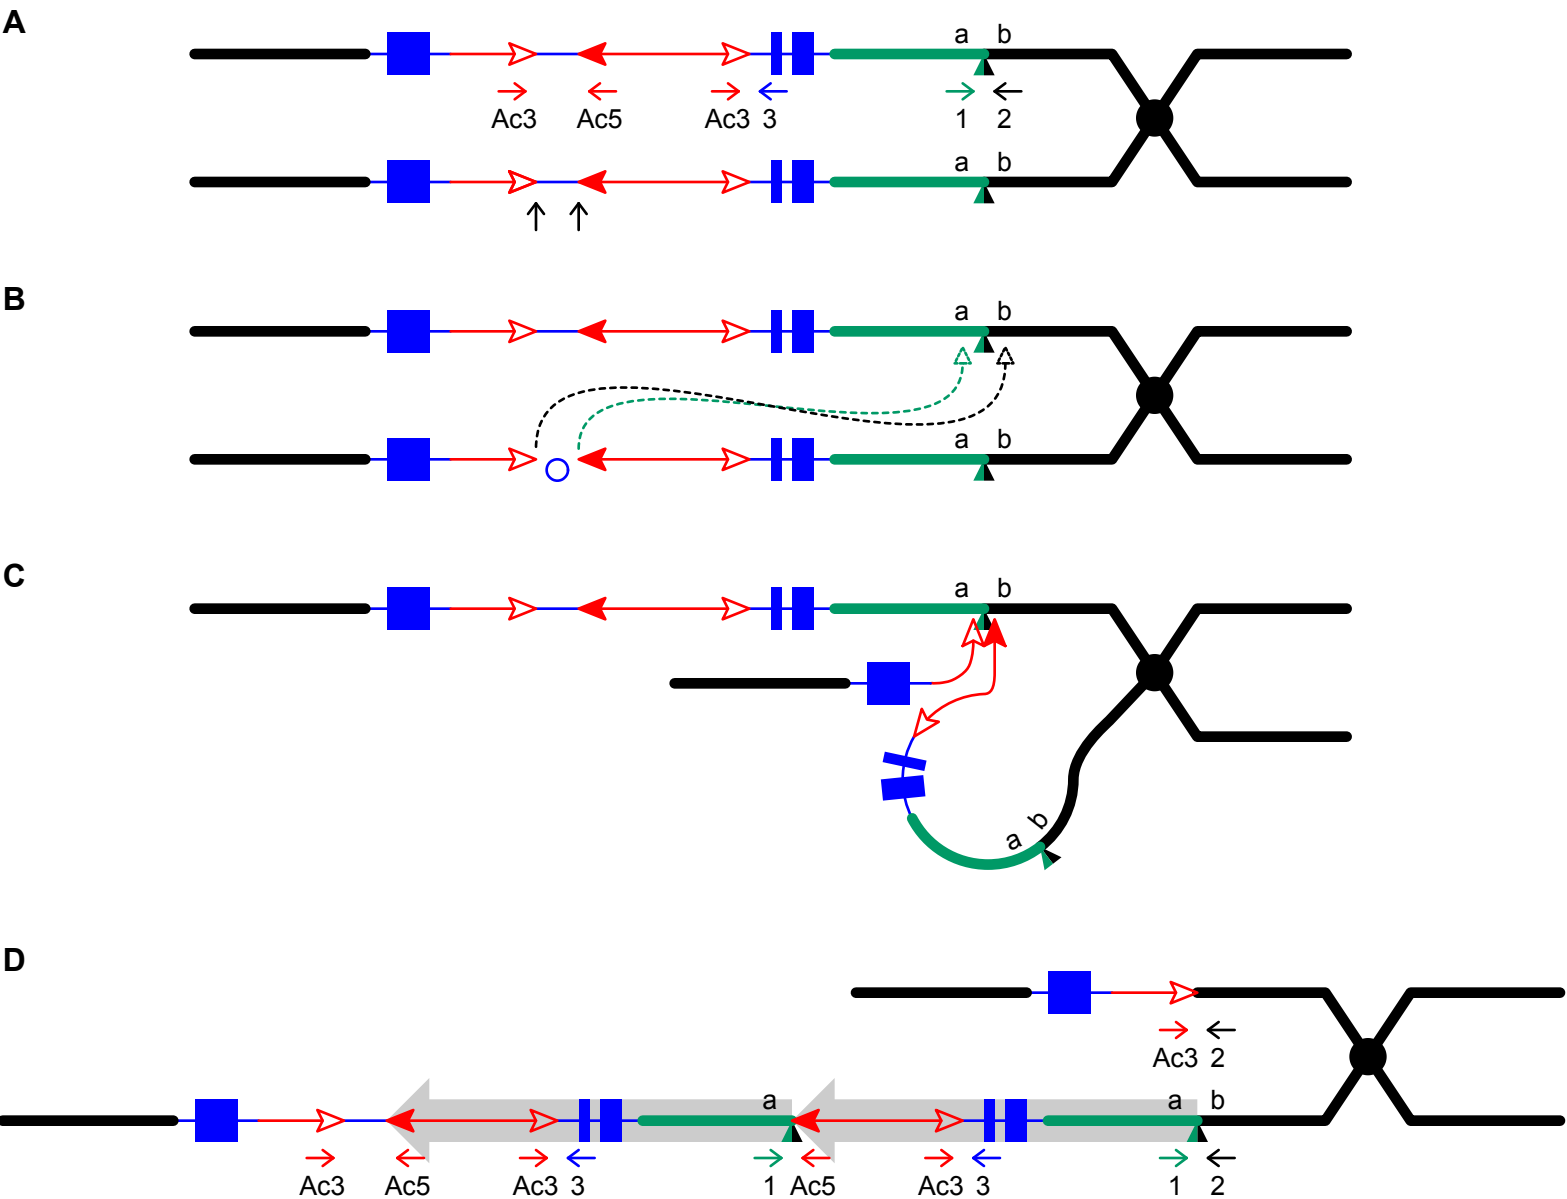

Supplement: supp [file elife_poa_e03724_Figure_1_figure_supplement_1.pdf › elife_poa_e03724_Figure_1_figure_supplement_1.pdf]
